# Supplementary figures and images for: Improved thermoelectric efficiency of Sb2Si2Te6 through yttrium-induced nanocompositing
Source: Royal Society of Chemistry journal article supplement (doi:10.1039/d4cp04219k), 2024-12-09

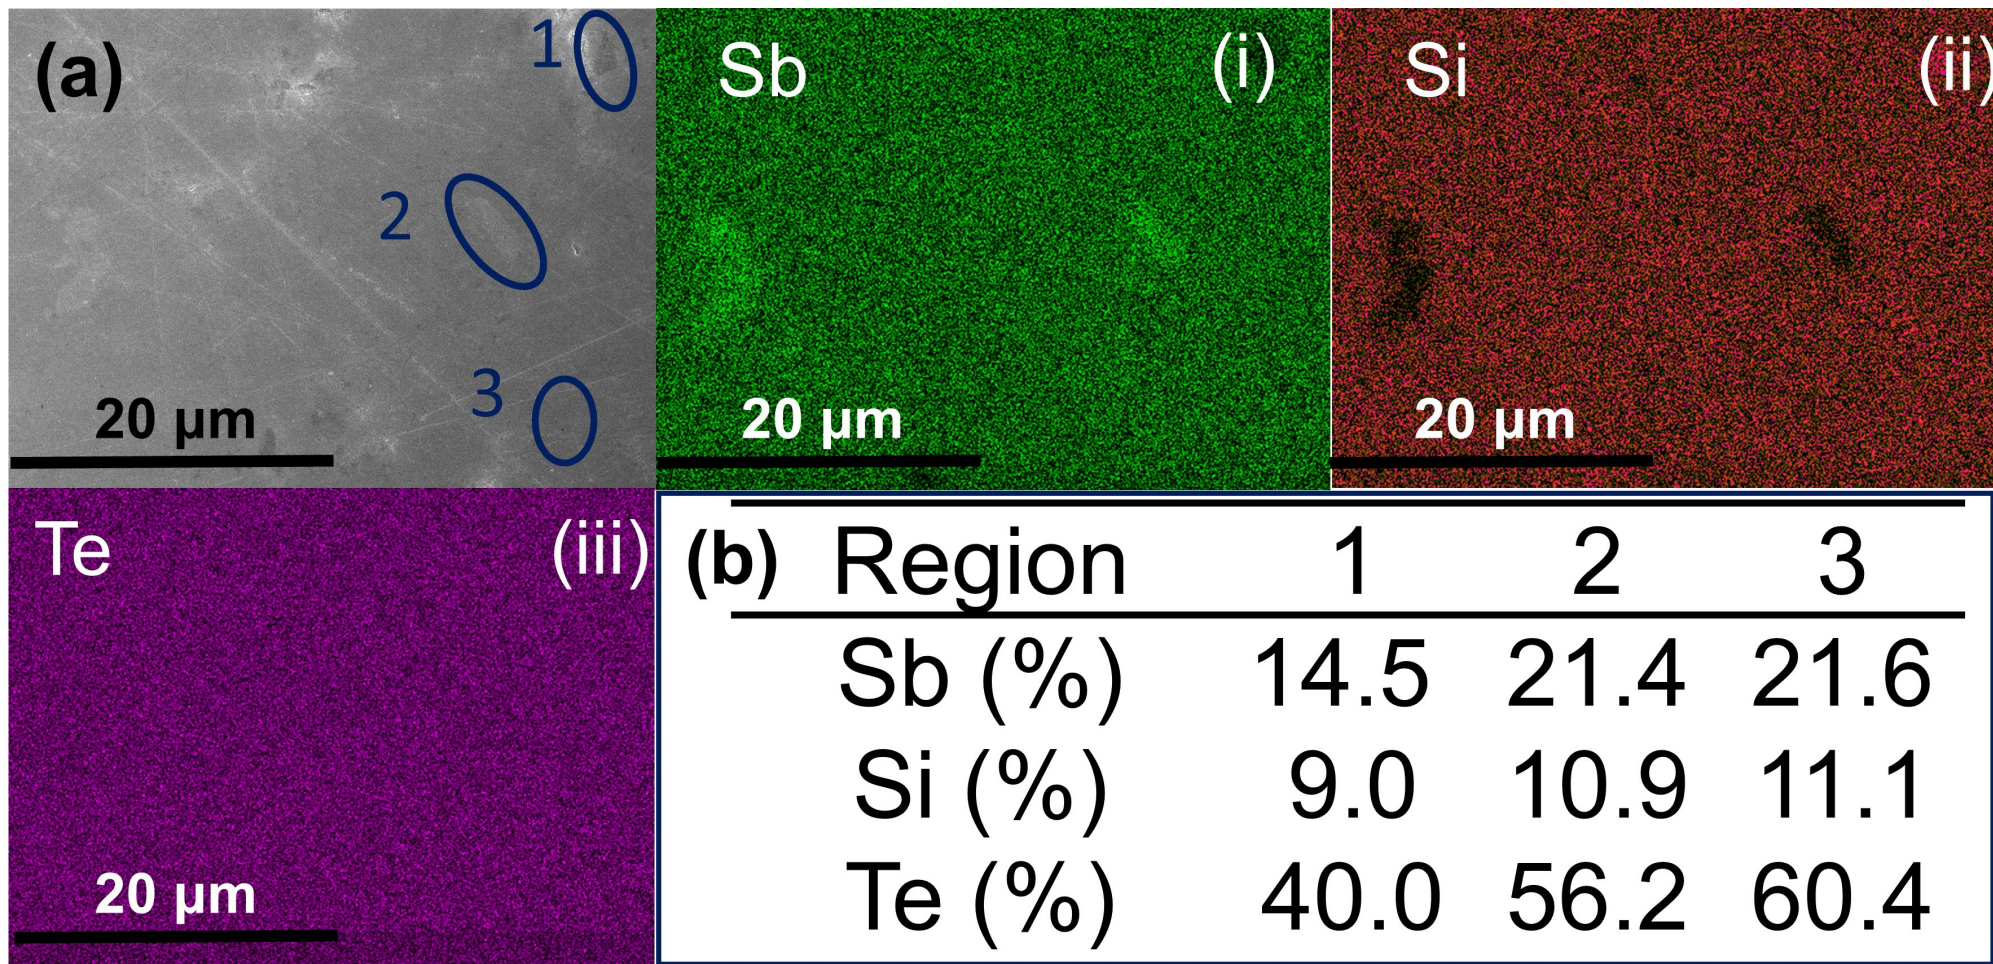

Supplement: d4cp04219k2.pdf [file d4cp04219k2.pdf]

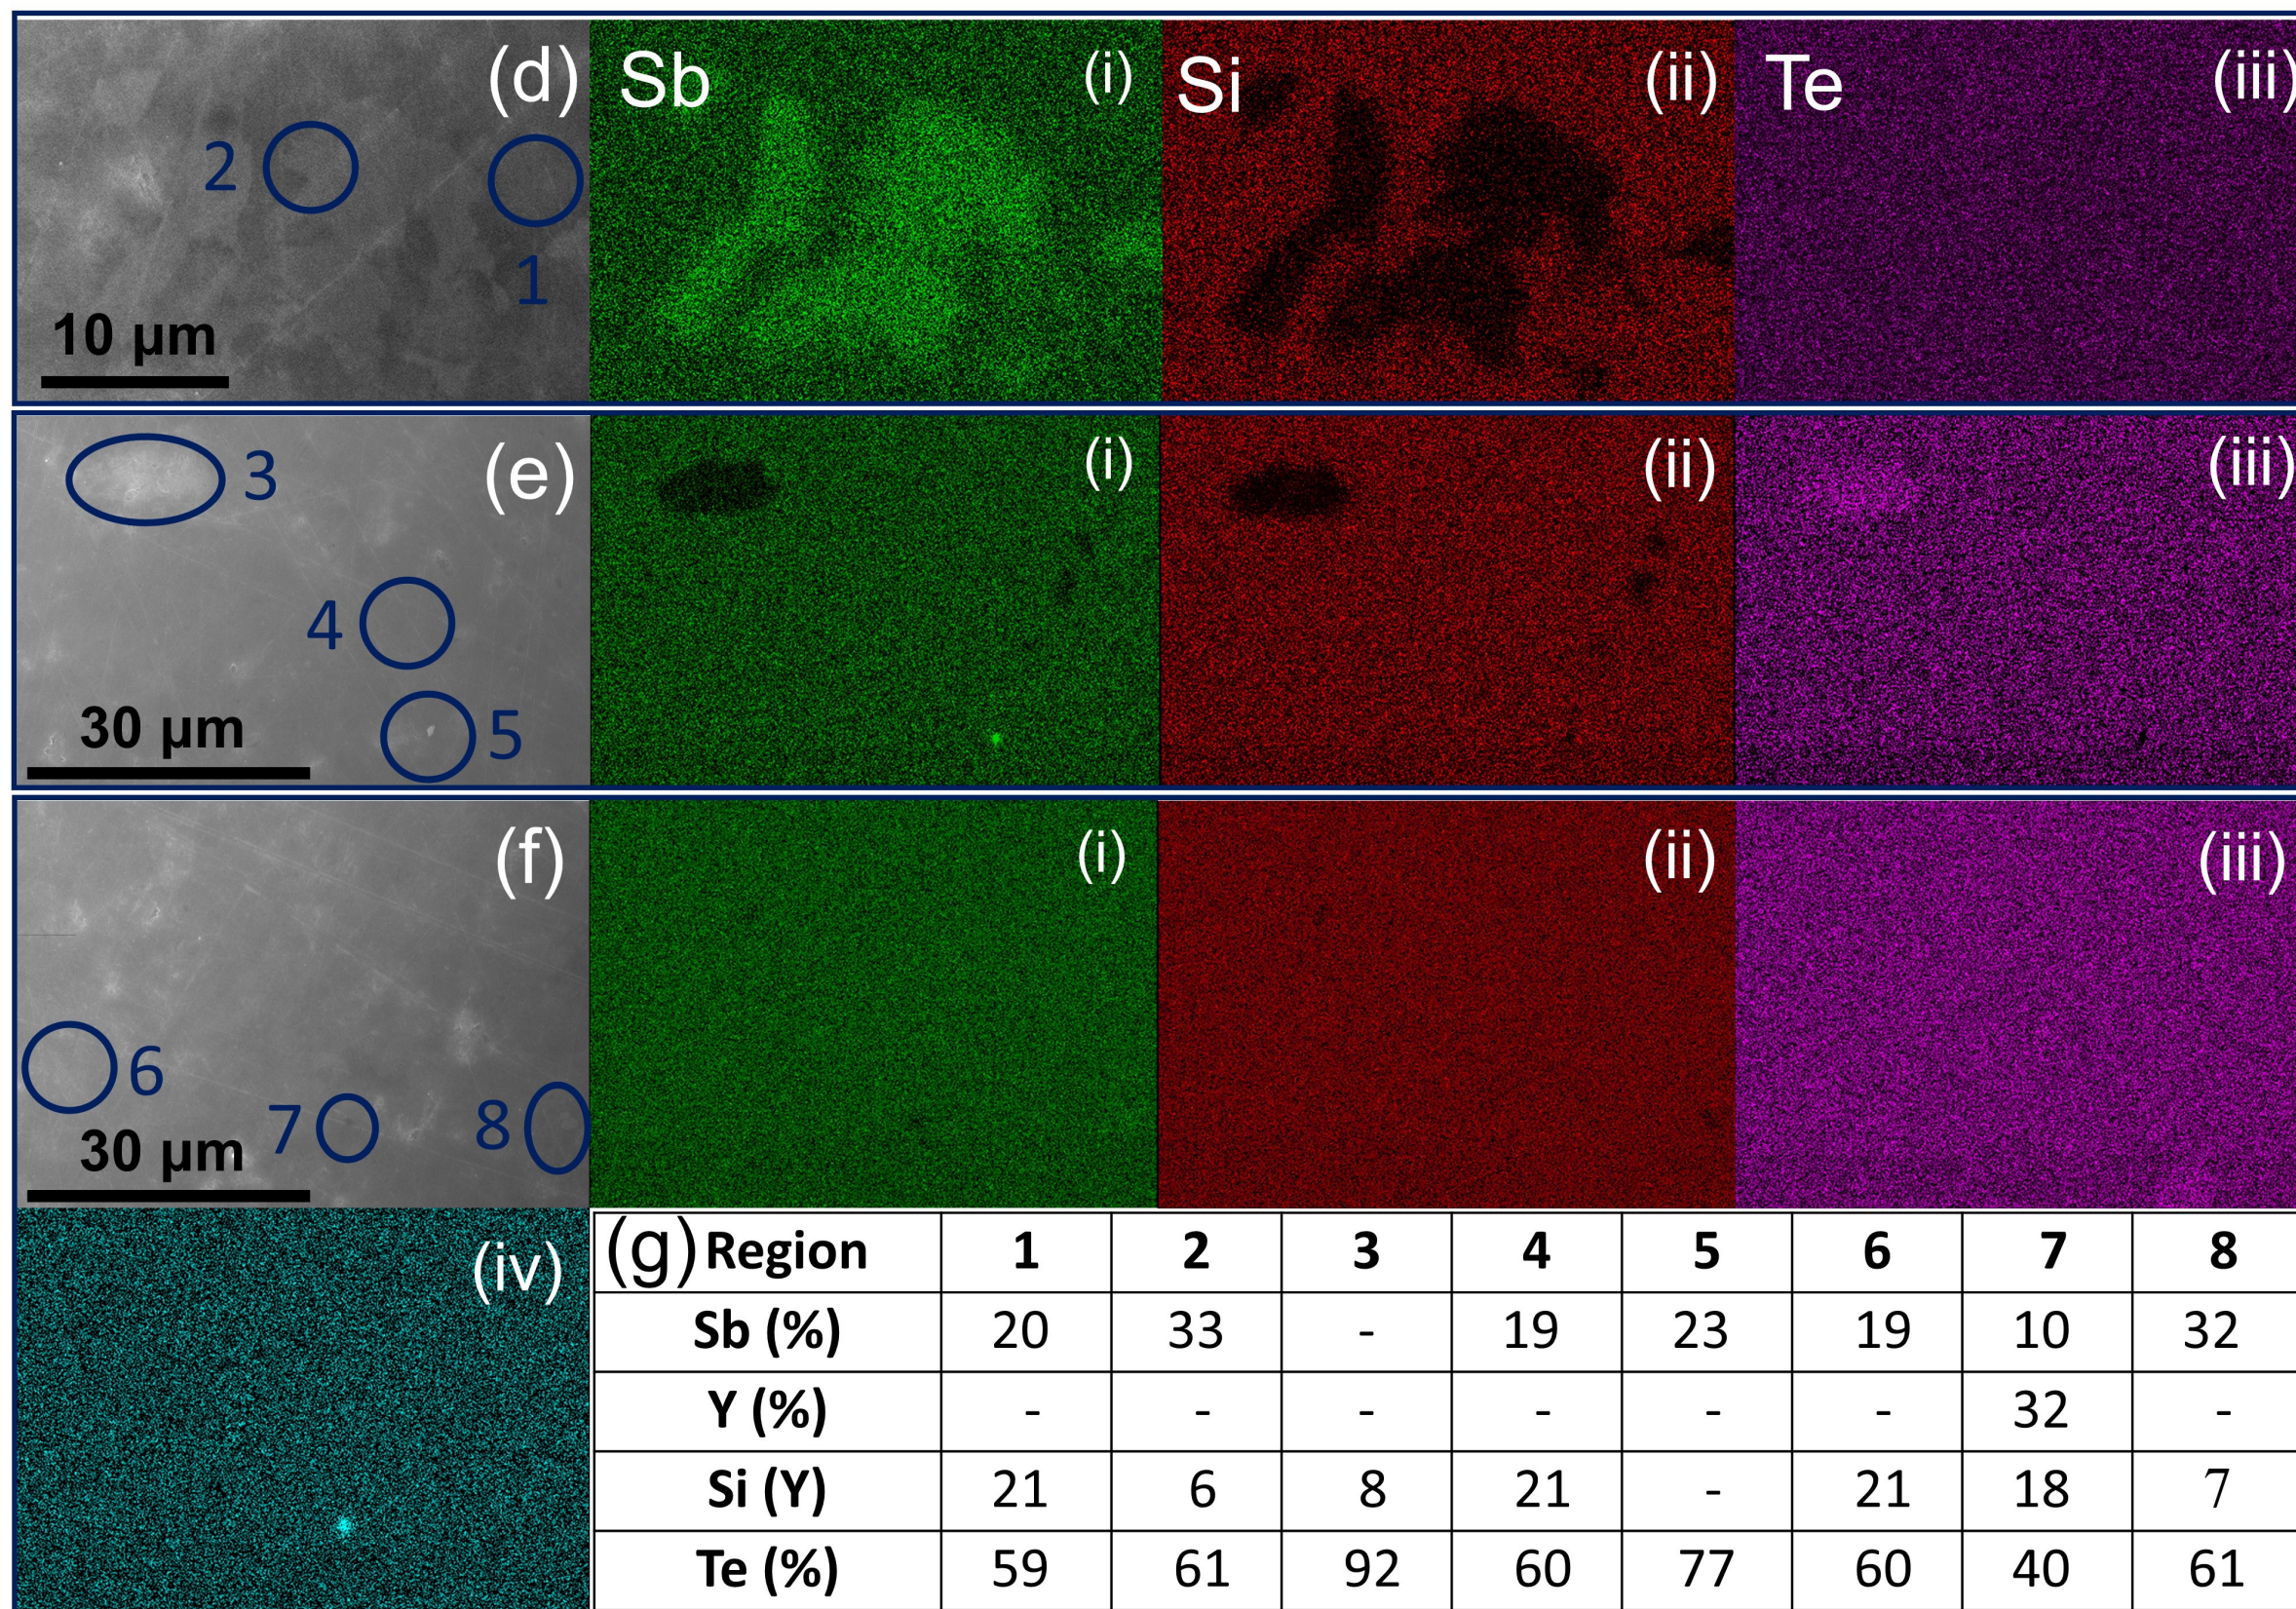

Supplement: d4cp04219k3.pdf [file d4cp04219k3.pdf]

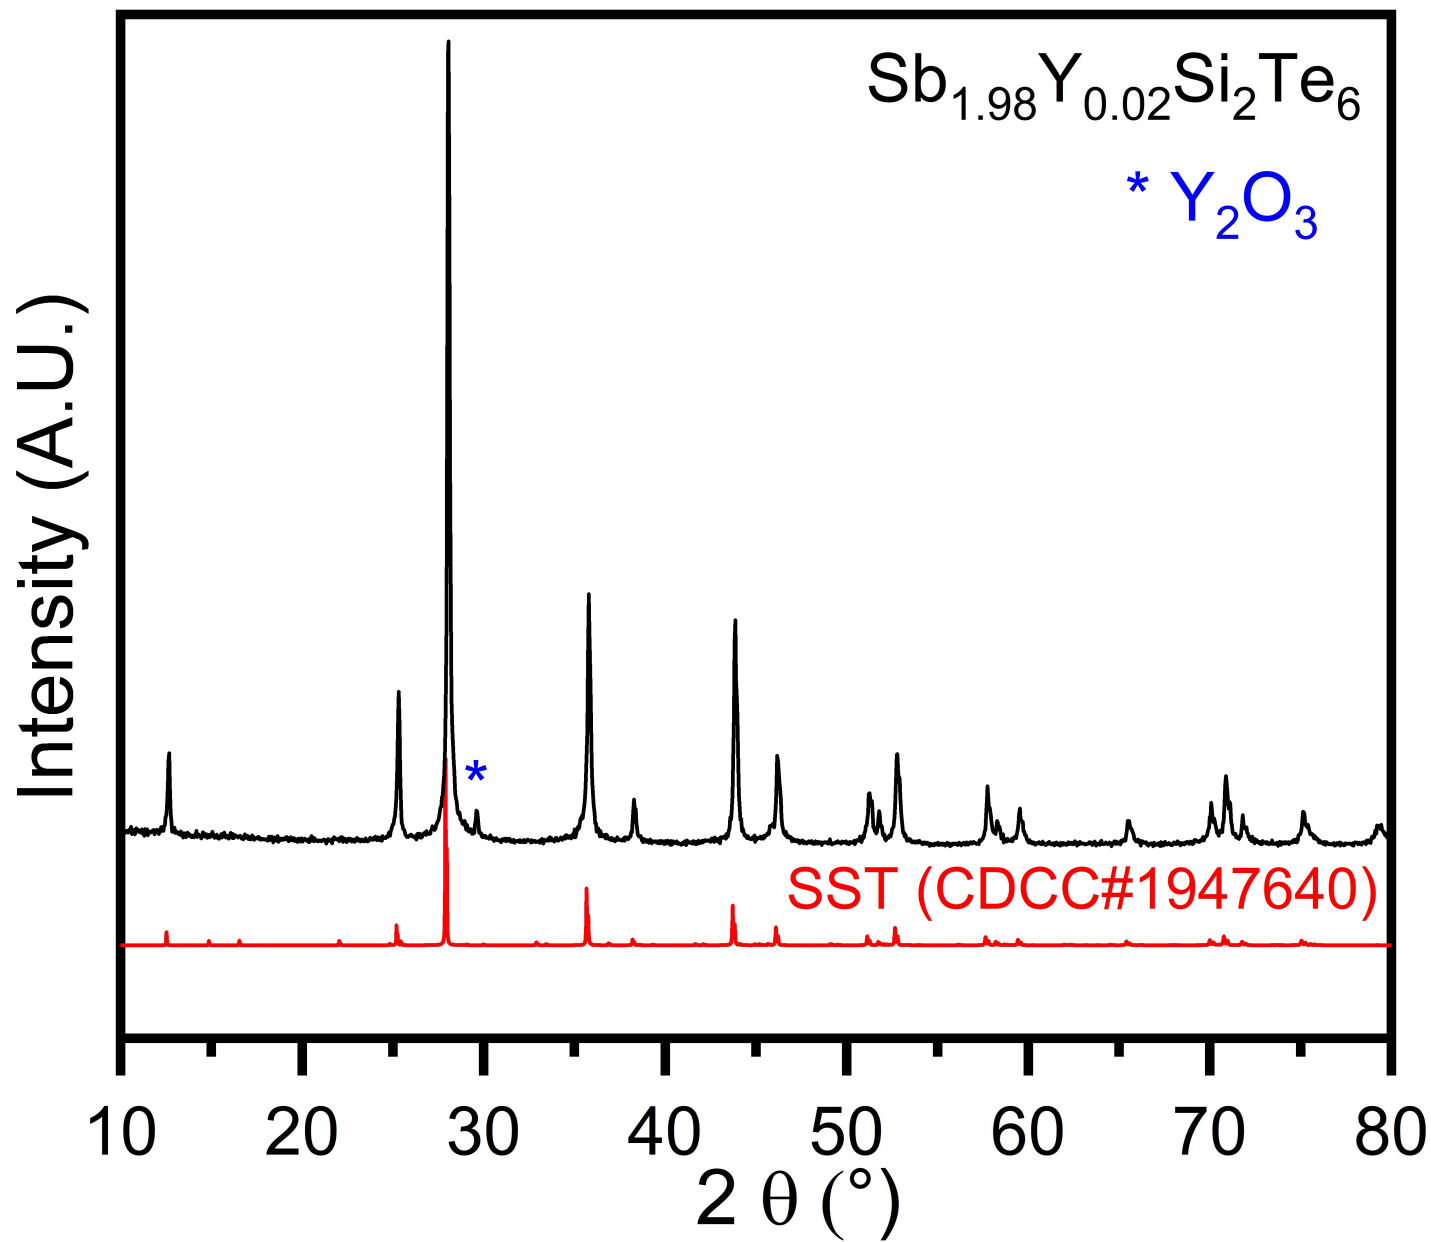

Supplement: d4cp04219k4.pdf [file d4cp04219k4.pdf]

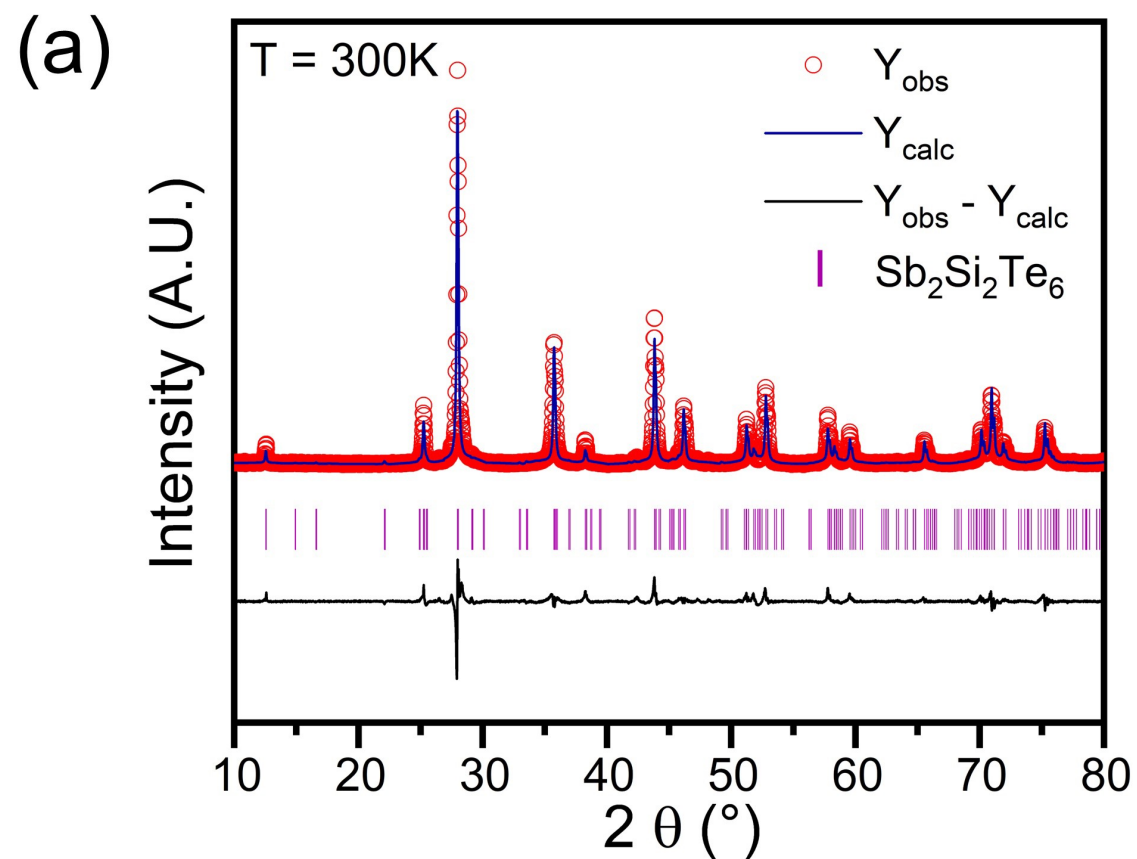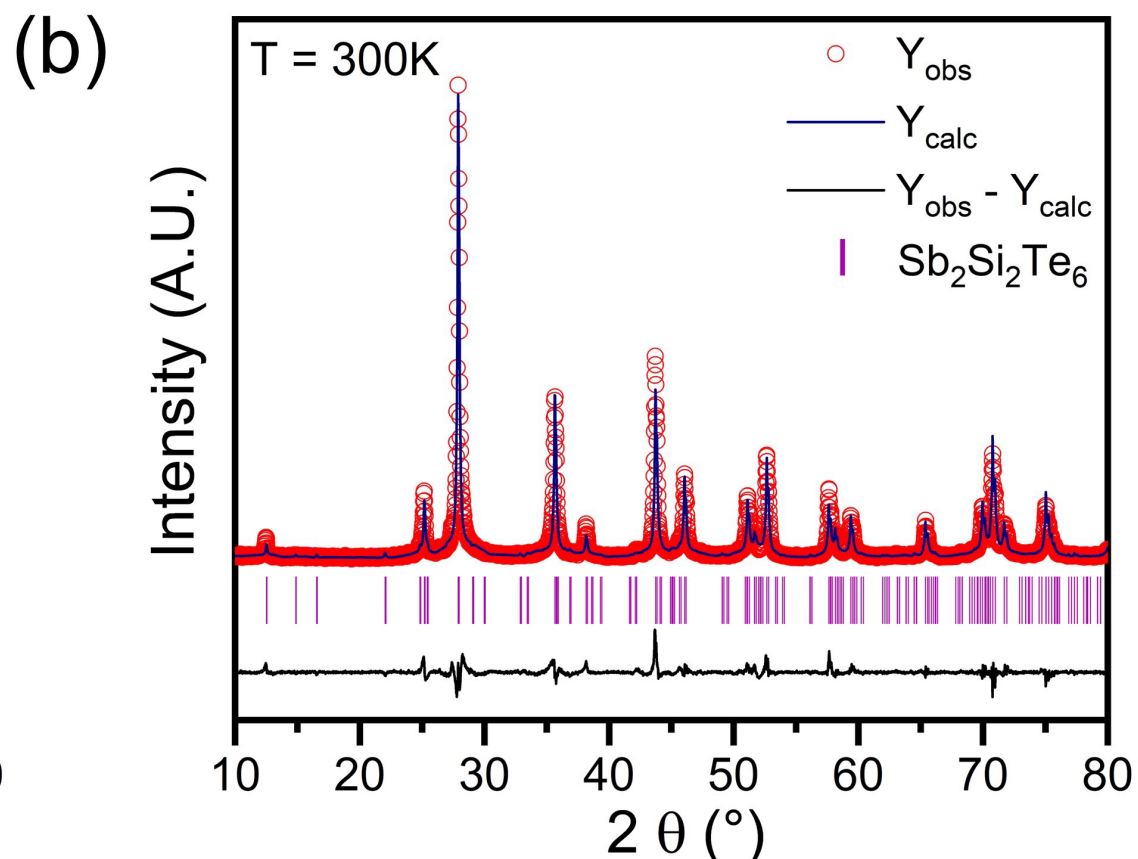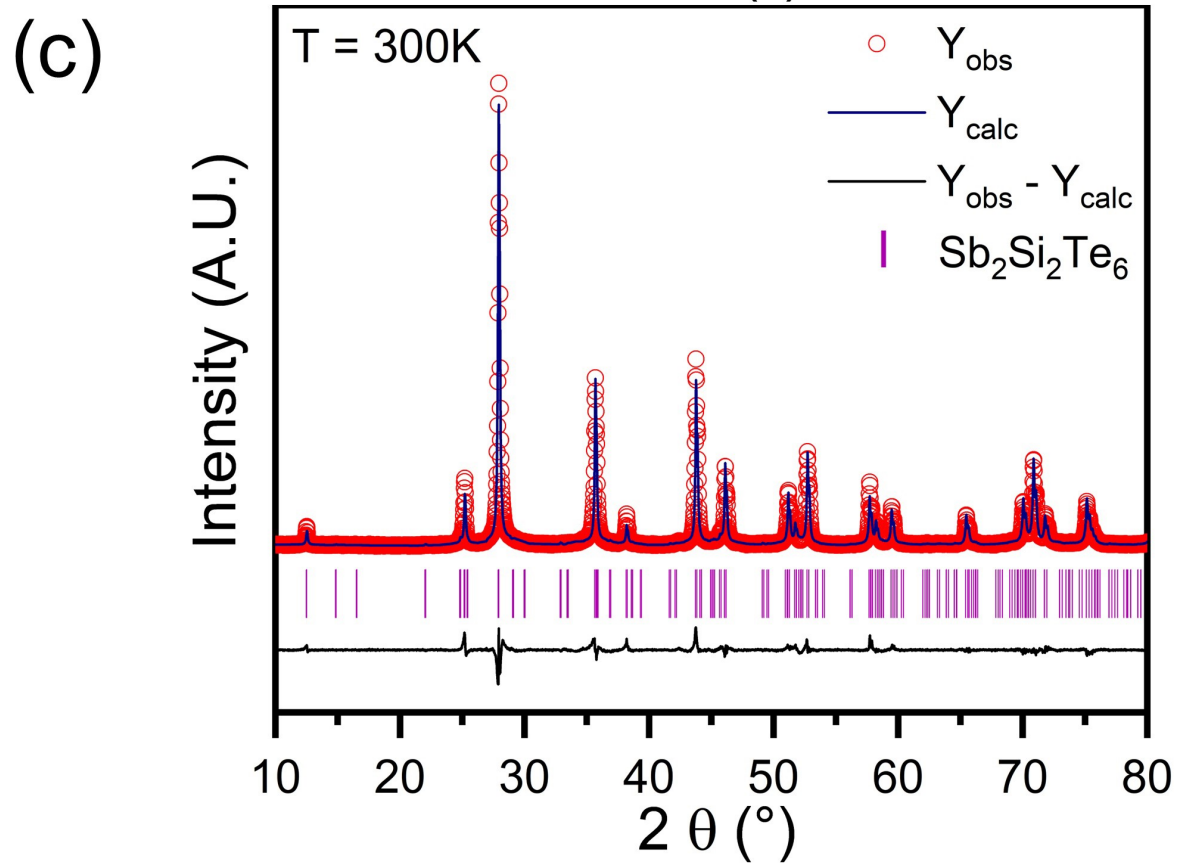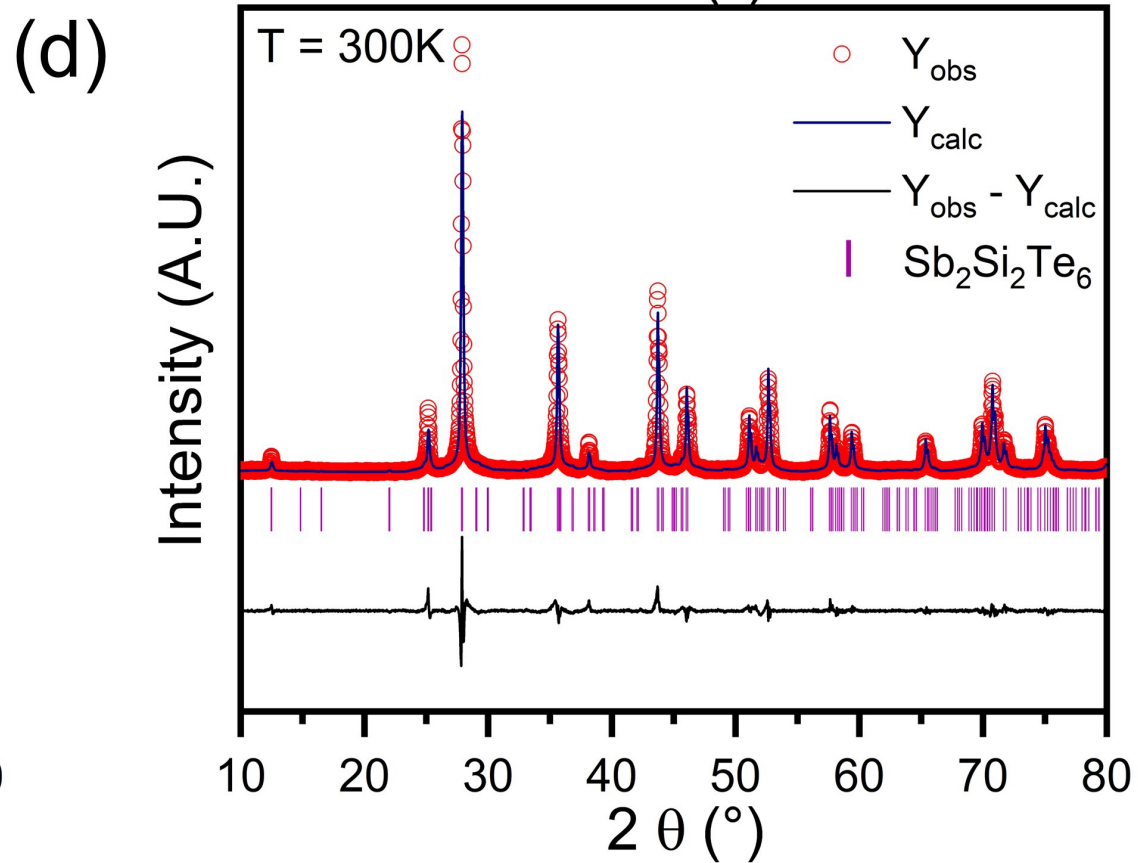

Supplement: d4cp04219k5.pdf [file d4cp04219k5.pdf]

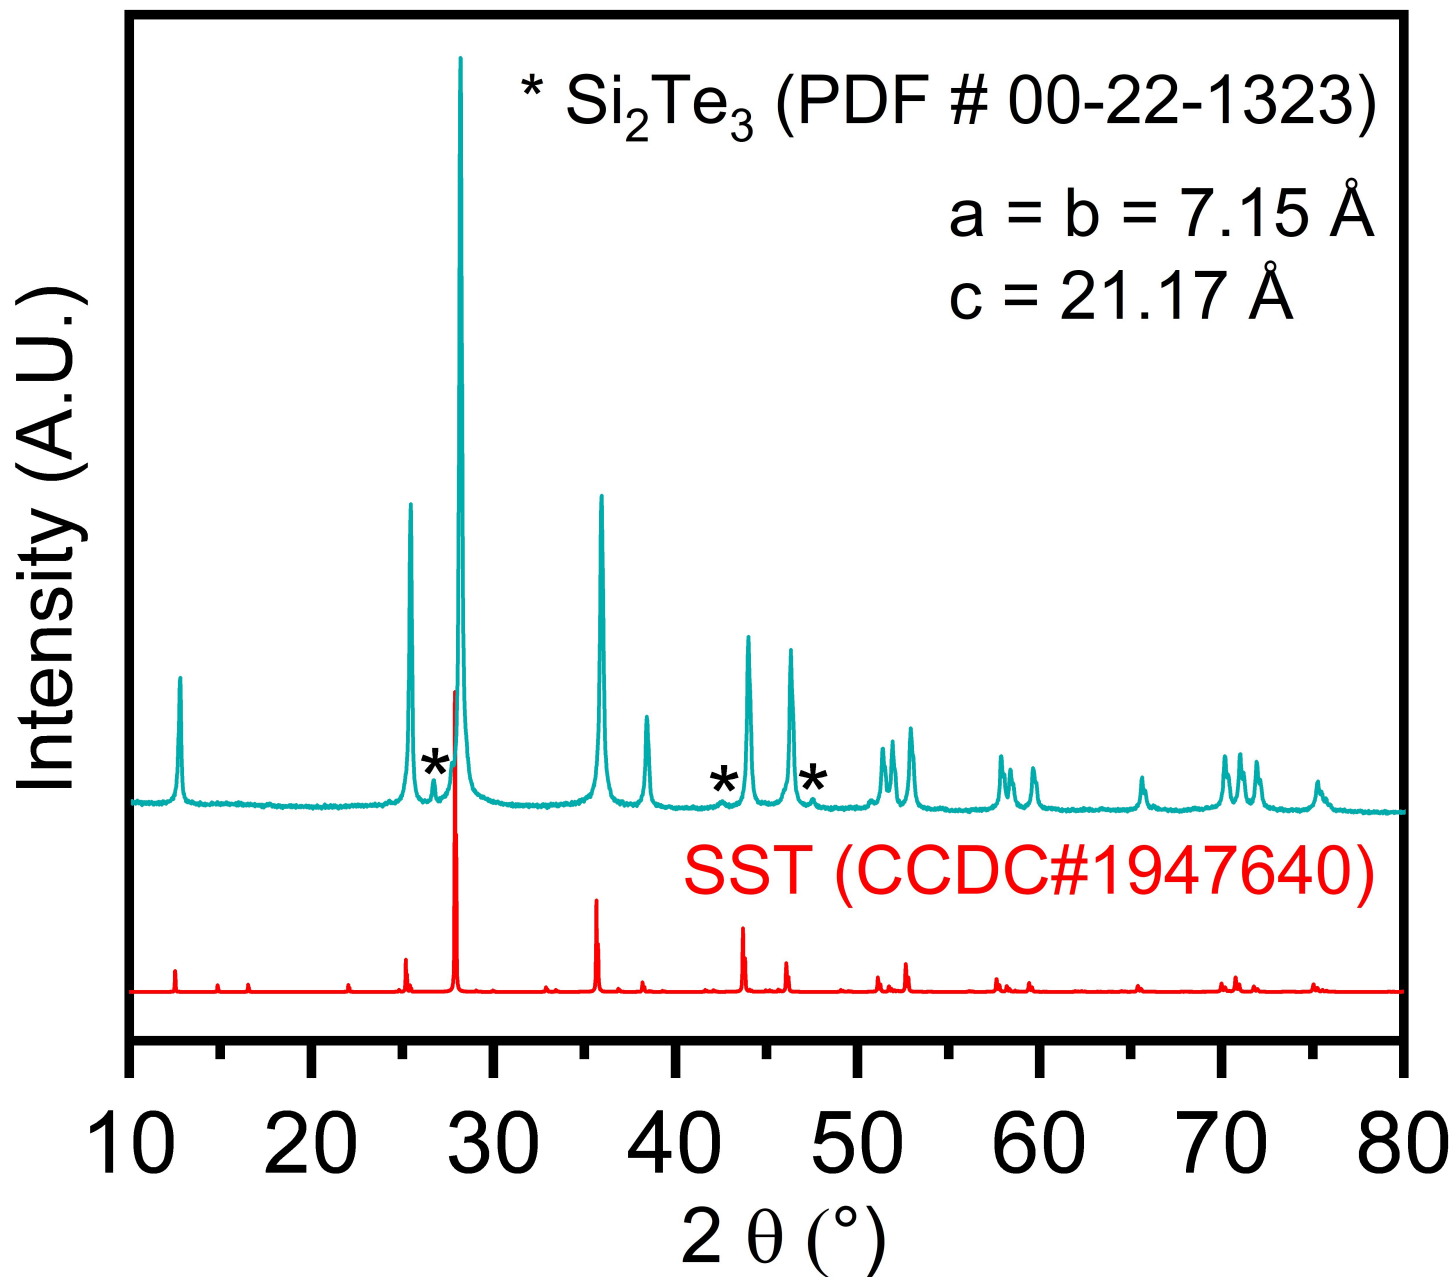

Supplement: d4cp04219k6.pdf [file d4cp04219k6.pdf]

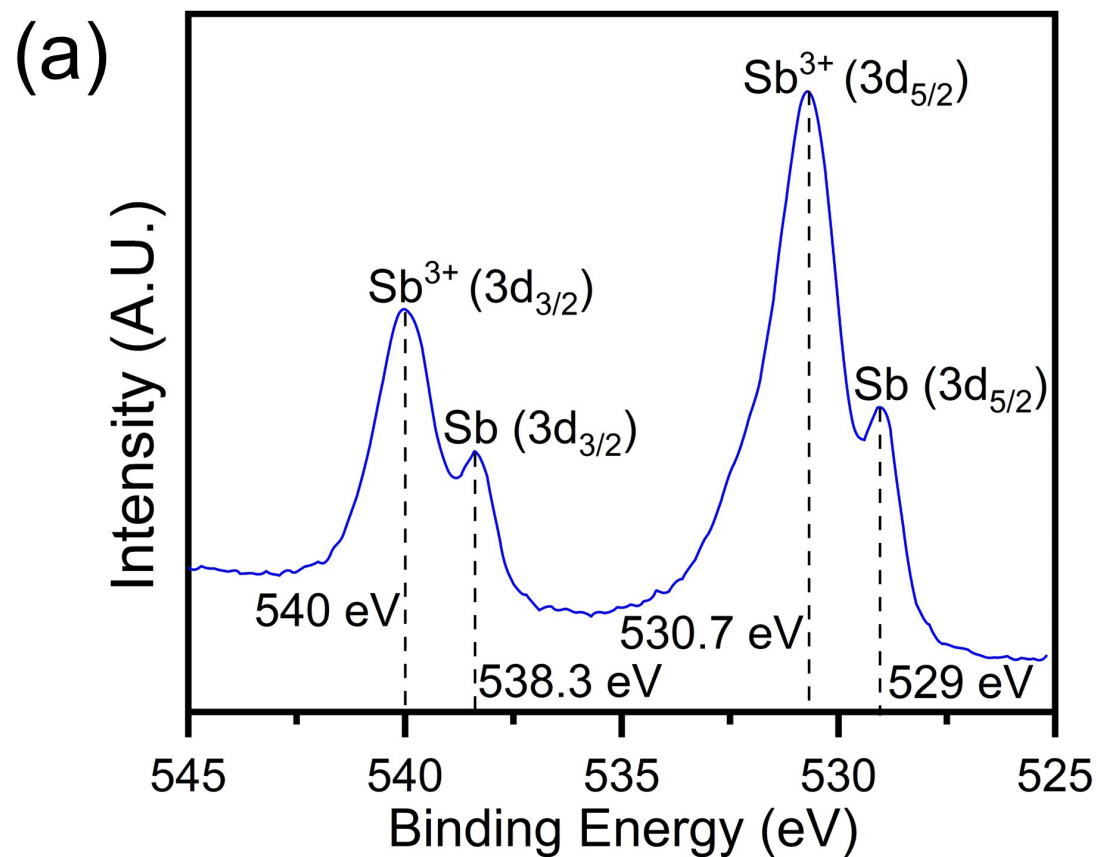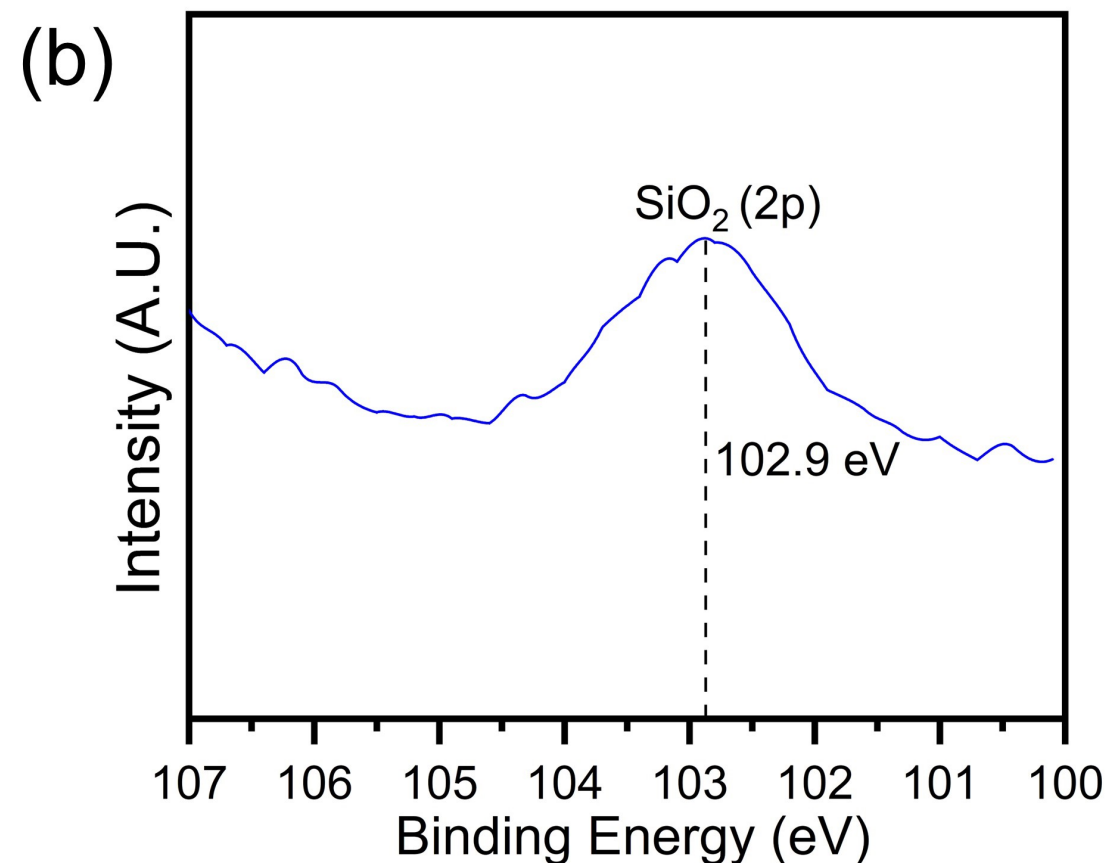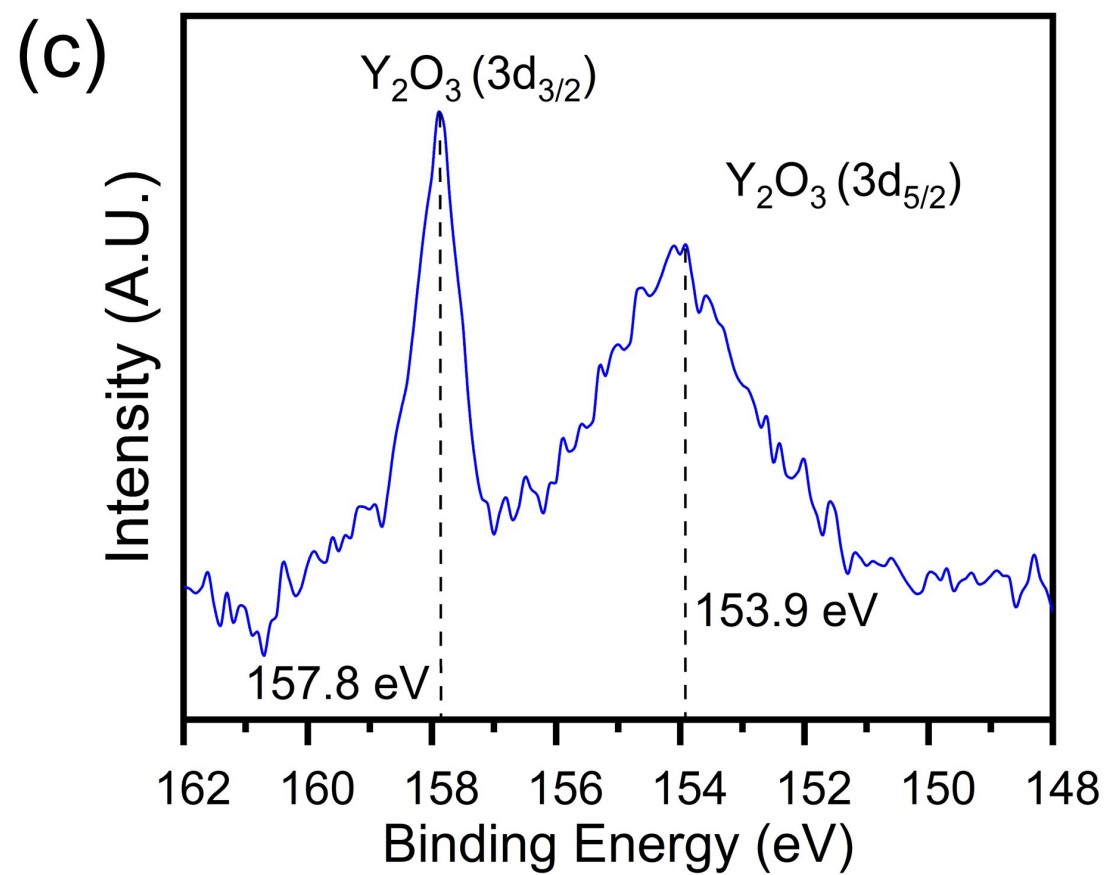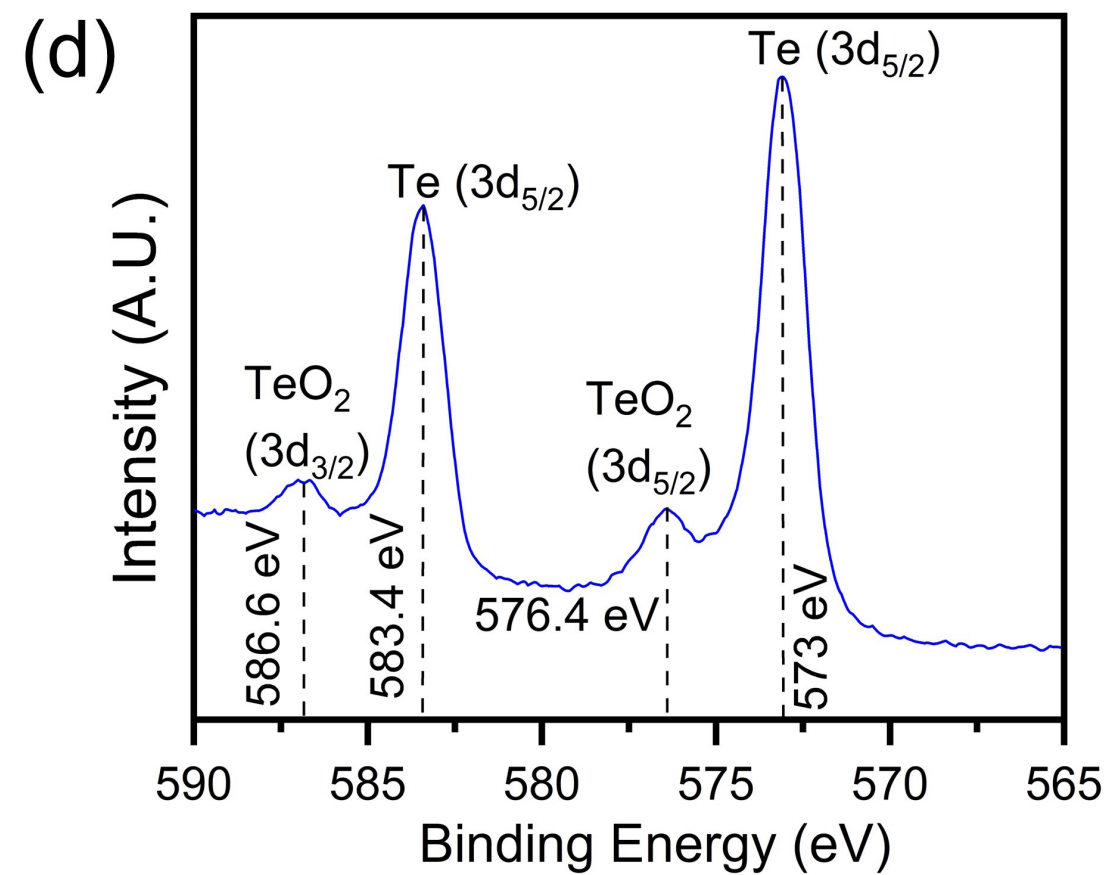

Supplement: d4cp04219k7.pdf [file d4cp04219k7.pdf]
